# Supplementary material for: Phenotypic outcomes in Mouse and Human Foxc1 dependent Dandy-Walker cerebellar malformation suggest shared mechanisms
Source: eLife journal article supplement (doi:10.7554/elife.20898), 2017-01-16
Supplement: supp [file elife_poa_e20898_Figure_2_figure_Supplement_1.pdf › elife_poa_e20898_Figure_2_figure_Supplement_1.pdf]

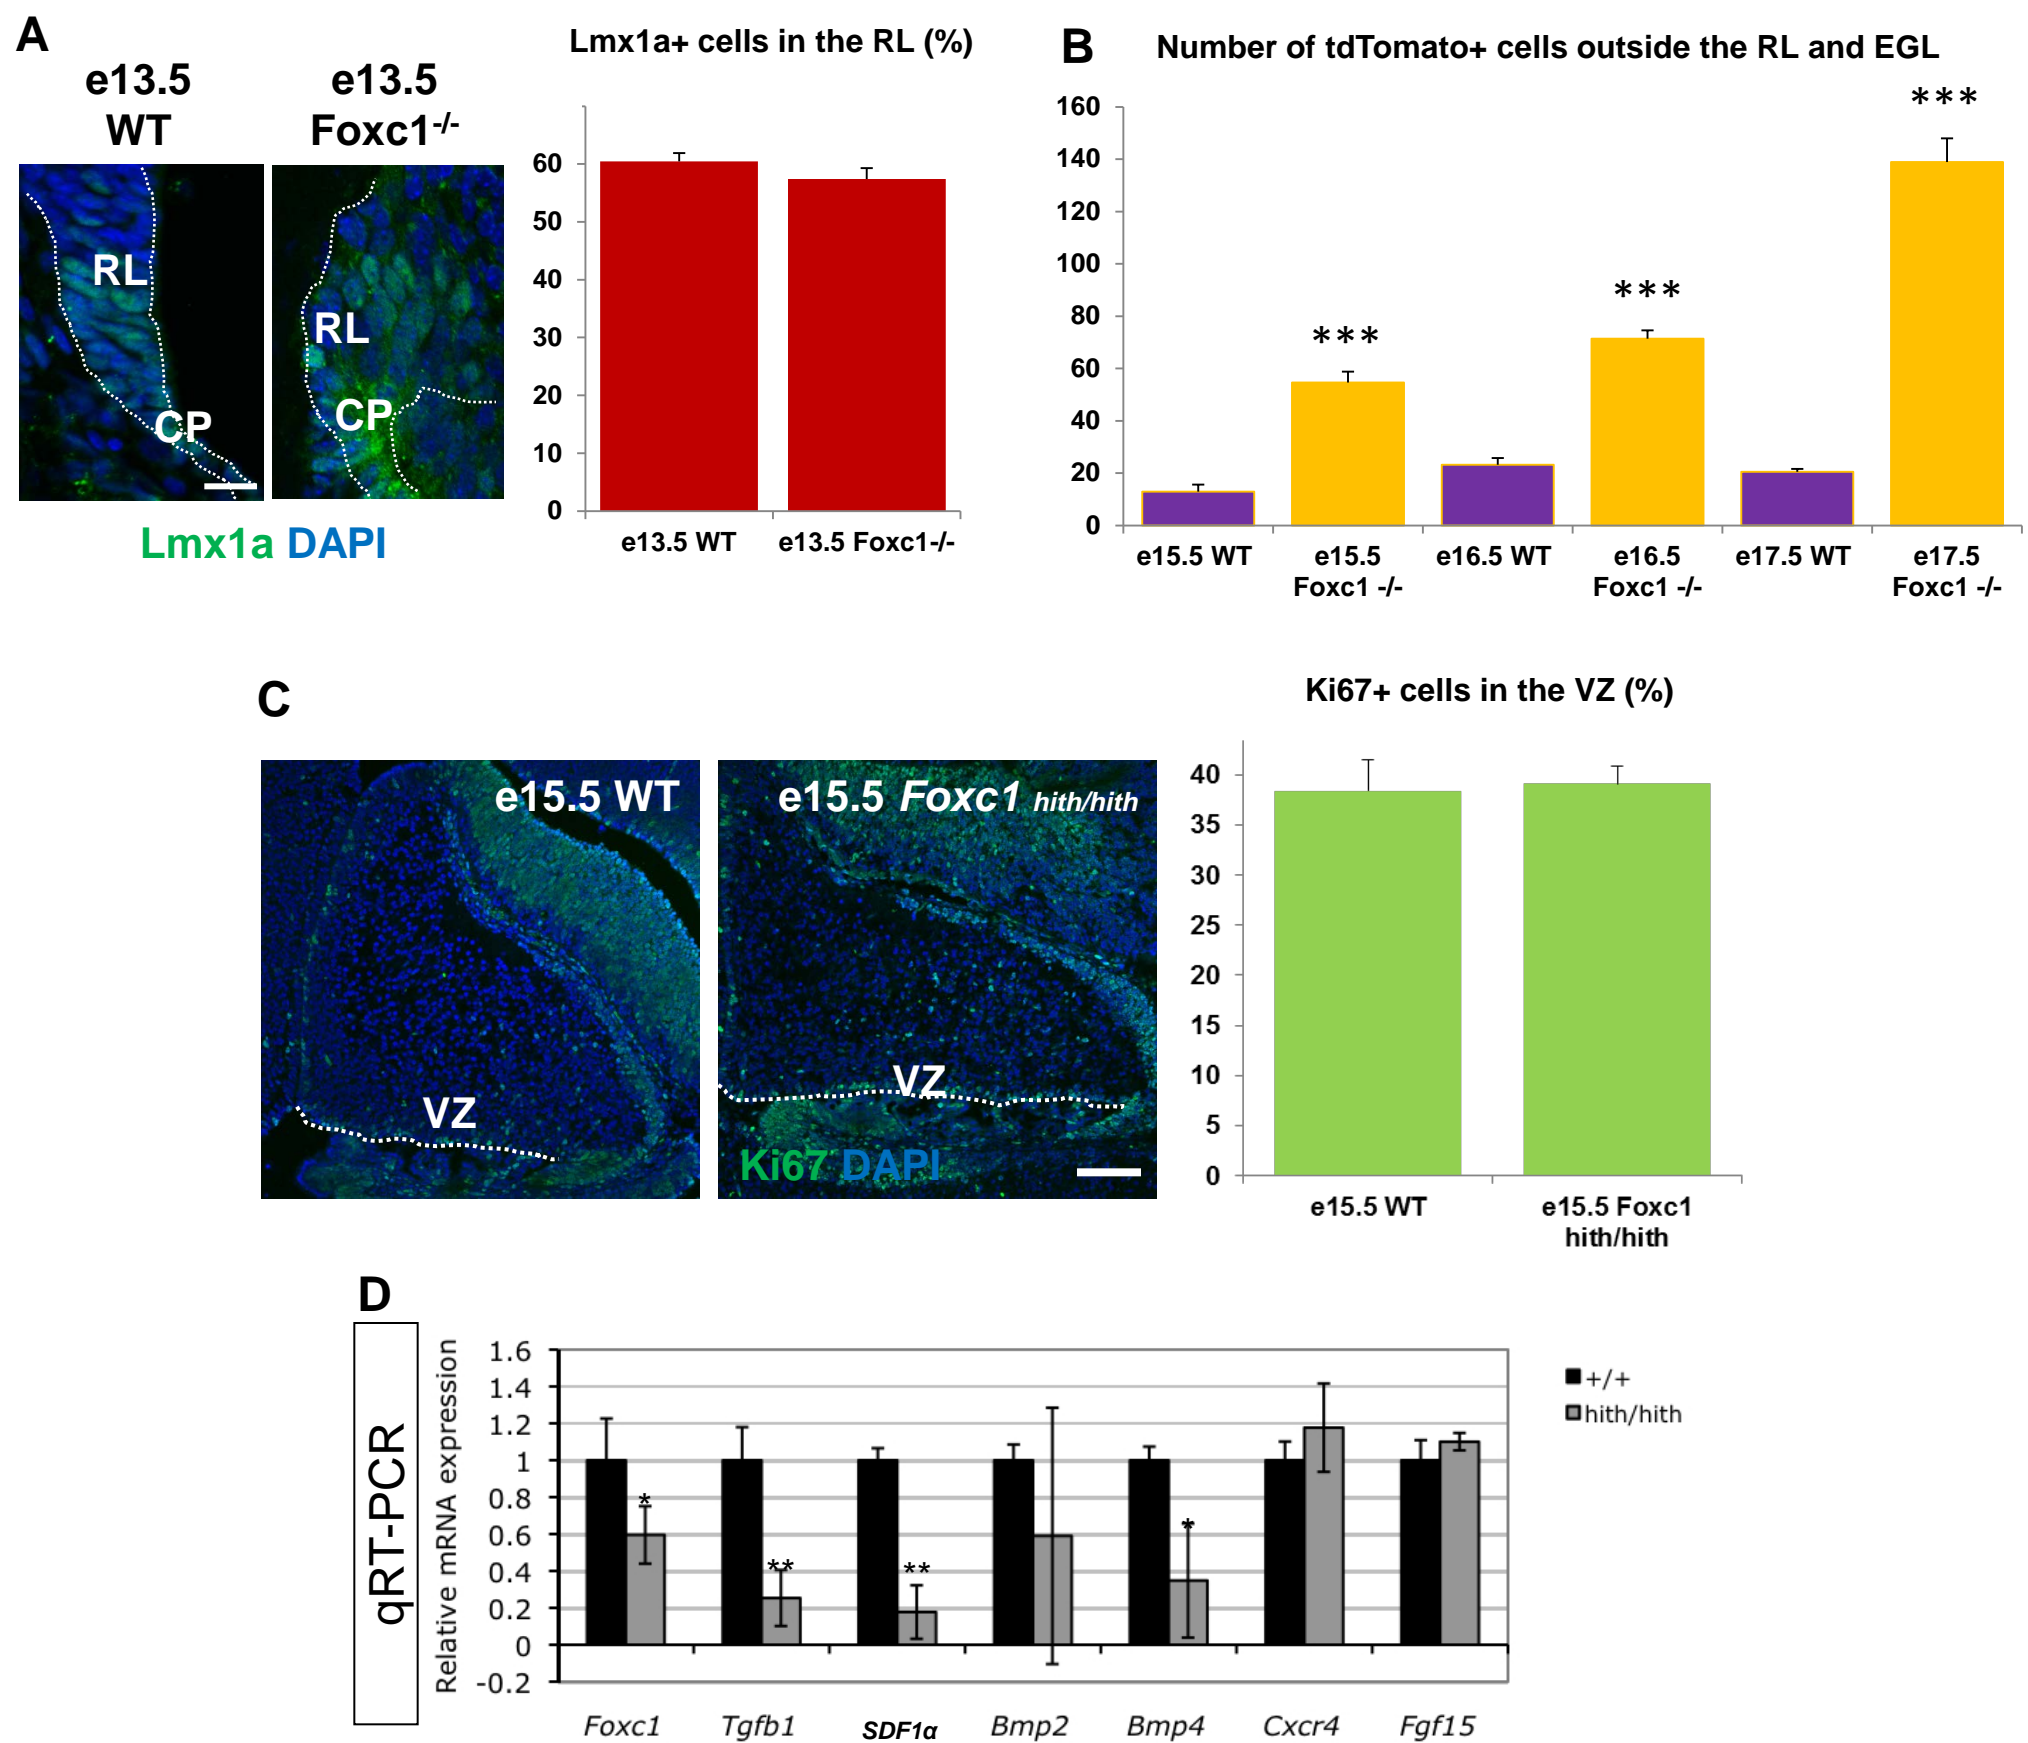

Figure 2 – Figure Supplement 1

**(A)** Quantification of Lmx1a+ cells in the RL of WT and *Foxc1* null mutants indicate that there is no difference in Lmx1a expression.  $P=0.17$ . Scale bar = 20  $\mu$ m **(B)** Quantification of tdTomato+ cells present outside the EGL and RL area in WT and *Foxc1* null mutants indicate that there is a significantly higher number of tdtomato+ cells present in the mutant, many of which are ectopic in nature. \*\*\* $P<0.005$  **(C)** Quantification of Ki67+ cells in the VZ of WT and *Foxc1*<sup>hith/hith</sup> mutants indicate that there is no difference in proliferation.  $P=0.4$ . Scale bar = 100  $\mu$ m **(D)** Mid-hindbrain expression of *Foxc1* targets in e12.5 wild-type (black) and *Foxc1*<sup>hith/hith</sup> (grey) littermate embryos, assayed by qRT-PCR. *Foxc1* reduction decreases hindbrain mesenchyme expressed genes (*Tgfb1*, *SDF1α*, *Bmp2* and *Bmp4*), but not neural tube expressed genes (*Fgf15* and *Cxcr4*). \* $P<0.05$ , \*\* $P<0.0001$ .
