# Supplementary material for: Phenotypic outcomes in Mouse and Human Foxc1 dependent Dandy-Walker cerebellar malformation suggest shared mechanisms
Source: eLife journal article supplement (doi:10.7554/elife.20898), 2017-01-16
Supplement: supp [file elife_poa_e20898_Figure_2_figure_Supplement_2.pdf › elife_poa_e20898_Figure_2_figure_Supplement_2.pdf]

**Figure 2 – Figure Supplement 2**

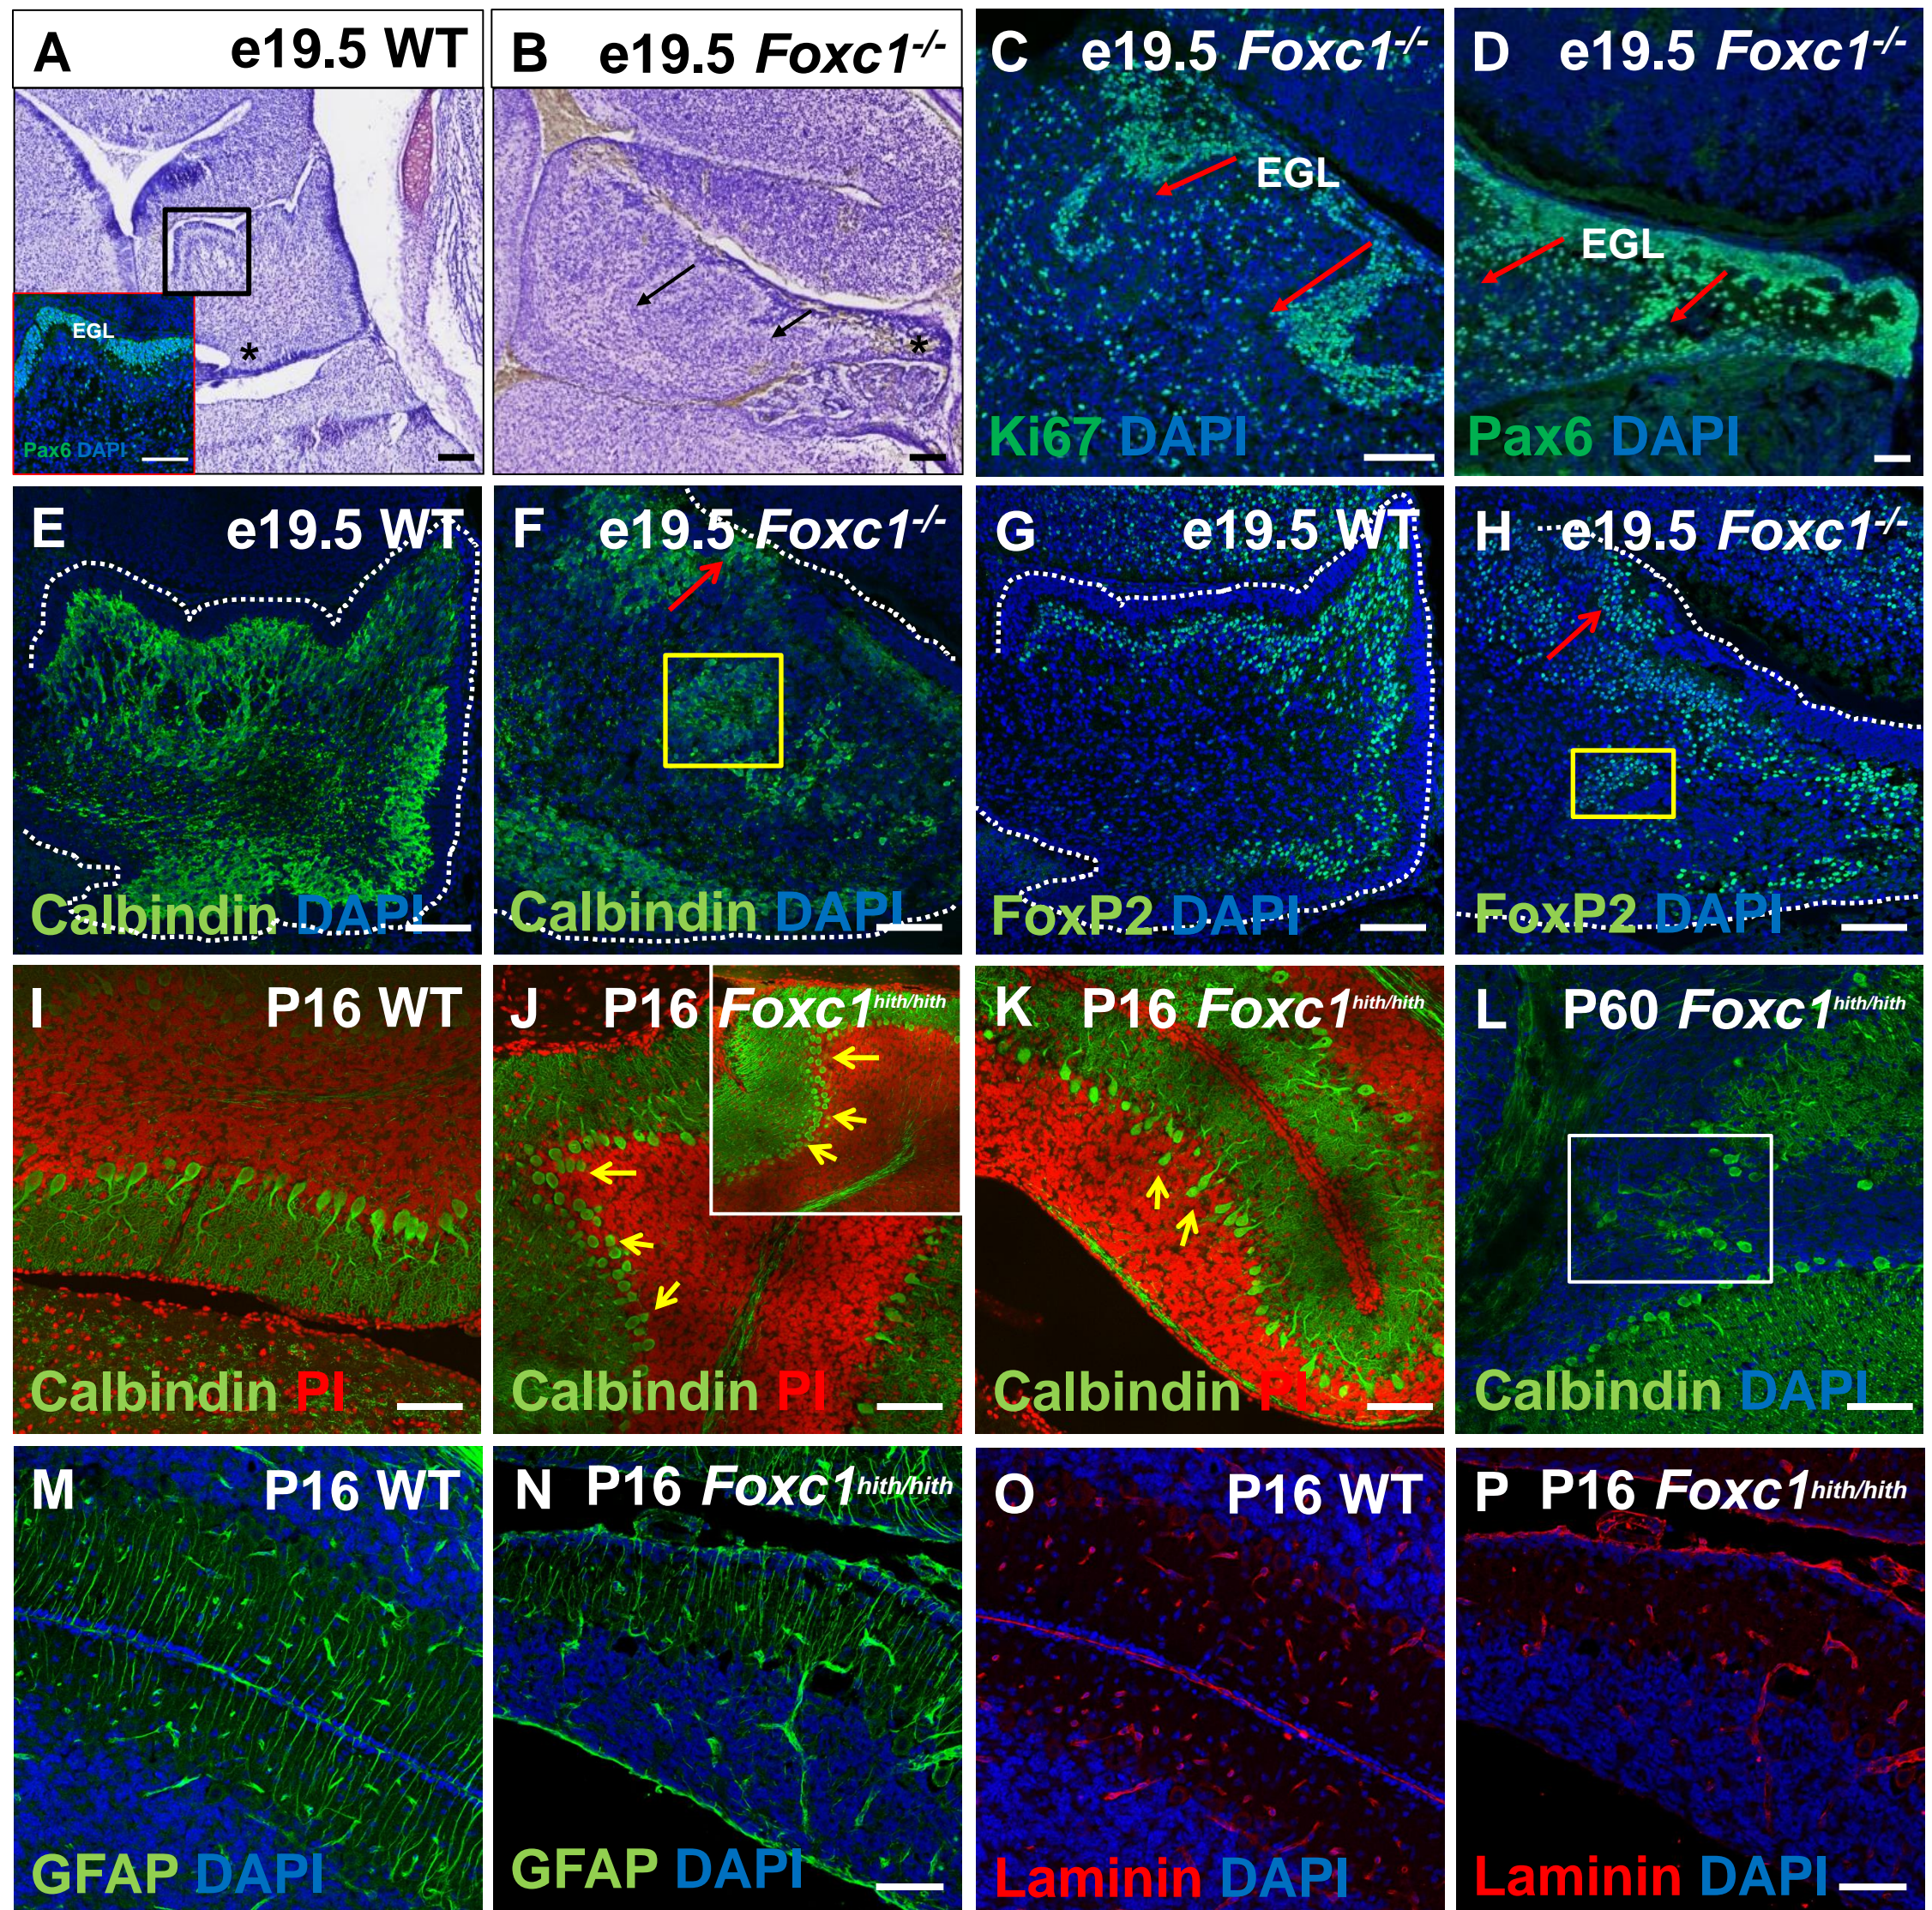

**Figure 2 – Figure Supplement 2** Ectopic populations of granule cell progenitors and Purkinje cells are found in both the *Foxc1*<sup>-/-</sup> and *Foxc1*<sup>hith/hith</sup> mutants.

(A-H) Sagittal sections of the e19.5 wild-type (A,E,G) and *Foxc1*<sup>-/-</sup> (B-D, F,H) cerebellum stained with Cresyl violet (A,B), Ki67 (C) and Pax6 (A; inset and D), showed the presence of ectopic GCPs in the *Foxc1*<sup>-/-</sup> cerebellum migrating precociously into the IGL from the pial surface (C,D; arrows). Multiple ectopic Purkinje cells were also found in the *Foxc1*<sup>-/-</sup> cerebellum (F,H, arrows, yellow box) as indicated by Calbindin (E,F) and Foxp2 staining (G,H). In P16 wild-type mice, Calbindin staining (I-L) demarked a monolayer of Purkinje cells (I). In P16 and P60 *Foxc1*<sup>hith/hith</sup> mice, Purkinje cells were disorganized, arranged in multiple layers (J,K; arrows), and ectopically embedded in the IGL (L, white box). Sagittal sections of the WT (M,O) and *Foxc1*<sup>hith/hith</sup> cerebellum (N,P) stained for GFAP (M,N) and Laminin (O,P) indicated that Bergmann glial fibers and the pial surface were structurally normal in the *Foxc1*<sup>hith/hith</sup> mutant cerebellum. Scale Bar = 100  $\mu$ m
